# Supplementary material
Source: publisher site journal article supplement (https://www.dovepress.com/article/119633)
Supplement: Supplementary file 1 [file get_supplementary_file.php]

## SUPPLEMENTARY MATERIAL

### DOMAIN-SPECIFIC COGNITIVE IMPAIRMENT IN PATIENTS WITH COPD AND CONTROL SUBJECTS

Fiona A.H.M. Cleutjens, Frits M.E. Franssen, Martijn A. Spruit, Lowie E.G.W. Vanfleteren, Candy Gijsen, Jeanette B. Dijkstra, Rudolf W.H.M. Ponds, Emiel F.M. Wouters, Daisy J.A. Janssen

#### Neuropsychological assessment

Our primary outcome, cognitive functioning, was measured with a detailed neuropsychological assessment consisting of the following subtests:

- (a) A shortened form of the Groninger Intelligence Test (GIT) will be used to determine general intelligence. Six subtasks will be administered: (1) Vocabulary: measures verbal comprehension. In this subtest 20 words of increasing difficulty are presented of which the participant has to choose the synonym out of five alternatives. The total score ranges between 0-20, with higher scores reflecting higher level of verbal intelligence; (2) Mental rotation: measures visualization. This subtest requires participants to decide which of several smaller geometric shapes from a larger set are needed to fill a larger geometric figure. Total scores ranges between 0-20, with higher scores reflecting higher level of visuo-spatial performance; (3) Figure Discovery: measures perceptual intelligence. In this subtest the subject is shown 20 cards with silhouettes of incomplete pictures of familiar objects or animals and then has to estimate what the picture depicts. The total score ranges between 0-20, with higher scores reflecting higher level of perceptual intelligence; (4) Doing sums: measures numeracy. This subtest requires participants to complete as many adding sums as possible within a time period of 1 minute. The total score ranges between 0-32, with higher scores reflecting higher level of numeracy; (5) Analogies: measures reasoning. In this subtest the subject has to choose 1 from 5 possibilities that correctly completes a 3 x 2 matrix of logical semantic relations (e.g., black-white, high-low, hot-?). The total score ranges between 0-20, with higher scores reflecting higher level of reasoning; (6) Fluency: measures word fluency. The Animal Naming Task and the Profession Naming Task are used to assess semantic verbal fluency and require patients to generate the names of as many animals respectively professions as possible within 60 seconds. Scores are determined by summing correct responses and reflect strategy-driven retrieval of information from semantic memory.(1)
- (b) Global cognitive functioning was assessed with the Mini-Mental State Examination (MMSE) as a brief screening for global cognitive functioning. This test consists of questions on orientation to time and place, registration, attention and calculation, recall, language, and visual construction to measure global cognitive functioning. The MMSE consists of 20 questions and the maximum score to achieve is 30 points, with a higher

score indicating a better cognitive performance. A score of 26-30 indicates 'normal cognitive functioning', a score of 24 or 25 'borderline normal cognitive functioning', a score below 24 'cognitive impairment' and a score below 18 'severe cognitive impairment'.(2)

- (c) The Stroop Colour-Word Test (SCW) will be used to assess cognitive flexibility and is composed of three trials using word, color, and interference cards. The first card shows names of colors, which have to be read out loud, printed in black. The second card shows patches of colors, which have to be named. The last card shows names of colors printed in incongruously colored ink and participants are instructed to name the color of the ink in the printed words. Errors, self-corrected errors, and time of completion for all trials will be recorded. The time needed for the last card will be subtracted from the mean score for the first and second cards to obtain an interference score. This interference score can be regarded as a measure of inhibition of a habitual response (reading) which is part of the domain of executive functioning.(3)
- (d) The Concept Shifting Test (CST) which is a simple pen-and-paper test which measures concept shifting and executive functioning. This test consists of three subtasks. On each test sheet, 16 small circles are grouped in a larger circle. The small circles contain numbers, letters, or both, appearing in a fixed random order. Participants are requested to cross out the items in the right order. In the final part of the test, they have to alternate between numbers (1–8) and letters (A–H). The time needed to complete each subtask and errors will be recorded. Finally, participants are presented with a condition to control for basic motor speed in which empty circles have to be marked as fast as possible in a clockwise manner. The difference between the score for the last part, corrected for basic motor speed, and the mean score for the first and second parts also corrected for basic motor speed, represent the time needed for cognitive shifting. Cognitive shifting (or mental set shifting) is considered to be part of executive functioning.(4)
- (e) The Letter Digit Substitution Test (LDST) will be used as a measure of information processing speed. A code is presented at the top of the test form, with 10 digit/letter combinations. The participants fill in digits in blank squares indexed with a letter using the code key. The key and the stimuli are the same for the oral and written versions of the LDST. The written LDST version will be administered first, immediately followed by the oral version. The number of correct substitutions made in 60 seconds is the dependent variable for both test versions.(5)
- (f) The visual verbal learning task (VVL) visual version, will be used in order to measure memory and verbal learning. In this test, 15 words are visually presented, one after the other, at 2-s intervals. The participants are then asked to recall as many words as possible, in a random order. This procedure will be repeated five times. When the fifth trial has completed, a fixed battery of other cognitive tests will be administered for about 20 minutes. After the delay, unexpectedly for the participant, the instruction will be given to recall the words learned (delayed recall). This will be followed immediately by a recognition test, involving yes/no recognition of the fifteen words intermixed with fifteen

nontarget words. Dependent variables are the total number of recalled words in the first three trials, the number of words recalled after 20 minutes and the number of words recognized in the recognition trial.(6)

- (g) Digit span from the Wechsler Adult Intelligence Scale III (WAIS-III) as a measure of short-term memory. This test consists of two parts, namely orally presented digits forward and digits backwards. Subjects are required to repeat 3 - 9 digits forward and 2 - 9 digits backwards. There are two trials at each series length, and the test continues until both trials of a series length are failed. One point is awarded for each correct trial.(7)
- (h) The key-search of the Behavioural Assessment of the Dysexecutive Syndrome will be used as a measure of executive functioning. It is claimed that this test assesses ability to plan a strategy to solve a problem (finding a key lost in a field). The score is based on a number of criteria, including whether the rater believes the strategy to be systematic, efficient and likely to be effective. A penalty is imposed for lack of speed.
- (i) The zoo-map test of the Behavioural Assessment of the Dysexecutive Syndrome as a measure of executive functions. This is a test to assess ability independently to formulate and implement a plan (high demand condition) and to follow a pre-formulated plan (low demand condition). It involves plotting or following a route through a map that does not contravene a set of rules. The score is based on the successful implementation of the plan. Penalties are imposed for rule breaks and lack of speed.(8)
- (j) A validated Dutch translation of the Cognitive Failure Questionnaire (CFQ) which is a 25-item self-report inventory and comprises four main subscales: absent-mindedness, social interactions, names and words, and orientation. Participants are asked to indicate on a 5-point scale how often they experience subjective cognitive failures. The scale ranges from 'never (0)', 'very rarely (1)', 'occasionally (2)', 'quite often (3)', to 'very often (4)'. Total scores range between 0-100, with a higher scores indicating more subjectively experienced cognitive failures.(9)

## Additional tables

**Table S1. Neuropsychological outcome measures**

| Test name                                                      | Subscore or subtest                                                                                 | Parameter measures                                                                                                                       |
|----------------------------------------------------------------|-----------------------------------------------------------------------------------------------------|------------------------------------------------------------------------------------------------------------------------------------------|
| <b>Objective measures</b>                                      |                                                                                                     |                                                                                                                                          |
| Groninger Intelligence Test (GIT)                              | Subtests: vocabulary, mental rotation, figure discovery, doing sums, analogies, fluency             | Verbal comprehension, visualisation, perceptual intelligence, numeracy, reasoning, word fluency, and intelligence quotient (IQ)          |
| Mini-Mental State Examination (MMSE)                           | Subscore: total score                                                                               | Global cognitive functioning                                                                                                             |
| Stroop Color-Word Test (SCWT (                                 | Subtests: Card I, card II, card III, interference                                                   | (Selective) attention, general information processing speed, inhibition, and interference susceptibility                                 |
| Concept Shifting Test (CST)                                    | Subtests: CST-A, CST-B, CST-C, CST interference                                                     | (Divided) attention, information processing speed, simple motor speed, visual conceptual and visuomotor tracking, and mental flexibility |
| Letter Digit Substitution Test (LDST)                          | Subtests: written, oral, motor                                                                      | Attention, information processing speed, psychomotor speed                                                                               |
| Visual Verbal Learning Test (VVLTL), direct and delayed recall | Subscores: Trial 1, 2, 3, 4, and 5, total, delayed recall, recognition, retention                   | Verbal learning and memory                                                                                                               |
| Digit Span (DS) from the WAIS-R                                | Subtests: Forward, backward, total                                                                  | Verbal immediate memory, working memory, and general auditory attention                                                                  |
| Behavioural Assessment of the Dysexecutive Syndrome (BADSD)    | Subtests: Key search, zoo map                                                                       | Planning and priority setting                                                                                                            |
| <b>Subjective measures</b>                                     |                                                                                                     |                                                                                                                                          |
| Cognitive Failure Questionnaire (CFQ)                          | Subscores: absent-mindedness, social interactions, names and words and orientation, and total score | Cognitive failures in daily life                                                                                                         |

Abbreviations: BADSD, Behavioural Assessment of the Dysexecutive Syndrome; CFQ, Cognitive Failure Questionnaire; CST, Concept Shifting Test; DS, Digit Span; GIT, Groninger Intelligence Test, LDST, Letter Digit Substitution Test; MMSE, Mini-Mental State Examination; SCWT, Stroop Color-Word Test; VVLTL, Visual Verbal Learning Test.

**Table S2. Neuropsychological tests for the evaluation of general cognitive impairment**

| Test name | Subscore or subtest                                | Parameter measures                                    |
|-----------|----------------------------------------------------|-------------------------------------------------------|
| GIT-II    | Animal naming (number of animal names)*            | Semantic fluency                                      |
| SCWT      | Card III (time in seconds) <sup>†</sup>            | Attentional inhibition of a dominant response         |
| CST       | CST-C (time in seconds) <sup>†</sup>               | Alternating attention                                 |
| LDST      | 60 Sec (number correct: 0-125) <sup>‡</sup>        | Psychomotor speed and speed of information processing |
| VVLT      | Total recall (number correct: 0-75) <sup>‡</sup>   | Overall verbal learning                               |
|           | Delayed recall (number correct: 0-15) <sup>‡</sup> | Verbal memory after an interval                       |

At least 2 out of 6 subtest Z scores should be  $-1SD$  for the patients with COPD with general cognitive impairment. Abbreviations: CST, Concept Shifting Test; GIT, Groninger Intelligence Test; LDST, Letter Digit Substitution Test; SCWT, Stroop Color-Word Test; VVLT, Visual Verbal Learning Test. \*, Indicates score has no upper limit; <sup>†</sup>, Higher scores indicate worse performance; <sup>‡</sup>, Higher scores indicate better performance; Score or scale ranges are in parentheses

**Table S3. Neuropsychological tests for the evaluation of compound performance indices**

| Test name                    | Subscore or subtest                                                                                                                                                                                               | Parameter measures                                          |
|------------------------------|-------------------------------------------------------------------------------------------------------------------------------------------------------------------------------------------------------------------|-------------------------------------------------------------|
| <b>Psychomotor speed</b>     |                                                                                                                                                                                                                   |                                                             |
| SCWT                         | Card I (time in seconds)*                                                                                                                                                                                         | Reading speed                                               |
| CST                          | CST-A (time in seconds)*                                                                                                                                                                                          | Simple motor speed                                          |
| LDST                         | 60 Sec written and oral (number correct: 0-125) <sup>†</sup>                                                                                                                                                      | Psychomotor speed and speed of information processing       |
| <b>Planning</b>              |                                                                                                                                                                                                                   |                                                             |
| BADS                         | Key search (profile score: 0-4) <sup>†</sup><br>Zoo map (profile score: 0-4) <sup>†</sup>                                                                                                                         | Planning and priority setting                               |
| <b>Working memory</b>        |                                                                                                                                                                                                                   |                                                             |
| VVLT                         | Trial 1 (number correct: 0-15) <sup>†</sup>                                                                                                                                                                       | Immediate verbal span                                       |
| DS                           | Backward (span: 0-7) <sup>†</sup>                                                                                                                                                                                 | Working memory                                              |
| <b>Verbal memory</b>         |                                                                                                                                                                                                                   |                                                             |
| VVLT                         | Total recall (number correct: 0-75) <sup>†</sup><br>Delayed recall (number correct: 0-15) <sup>†</sup><br>Retention (percentage of words that were retained from the immediate to the delayed score) <sup>†</sup> | Overall verbal learning and verbal memory after an interval |
| <b>Cognitive flexibility</b> |                                                                                                                                                                                                                   |                                                             |
| SCWT                         | Card III (time in seconds)*                                                                                                                                                                                       | Attentional inhibition of a dominant response               |
| CST                          | CST-C (time in seconds)*                                                                                                                                                                                          | Alternating attention                                       |

Abbreviations: SCWT, Stroop Color-Word Test; CST, Concept Shifting Test; LDST, Letter Digit Substitution Test; BADS, Behavioural Assessment of the Dysexecutive Syndrome; VVLT, Visual Verbal Learning Test; DS, Digit Span. \*, Higher scores indicate worse performance. Score or scale ranges are in parentheses. <sup>†</sup>, Higher scores indicate better performance.

**Table S4. Raw unadjusted means on neuropsychological measures, compound z-scores, and *P*-values adjusted for matching variables and comorbidities in patients with COPD and controls**

| Outcome measure                                                               | COPD patients (n=90) | Controls (n=90) | Adjusted <i>P</i> -value* |
|-------------------------------------------------------------------------------|----------------------|-----------------|---------------------------|
| <b>Global cognitive functioning</b>                                           |                      |                 |                           |
| MMSE, mean (SD) <sup>†</sup>                                                  | 27.4 (2.3)           | 28.1 (1.6)      | 0.068                     |
| Global cognitive impairment (MMSE ≤24), n (%)                                 | 7 (7.8)              | 2 (2.2)         | 0.356                     |
| <b>Domain-specific cognition</b>                                              |                      |                 |                           |
| <b>Psychomotor speed (compound z-score), mean (SD)</b>                        | -0.5 (1.1)           | 0.3 (0.7)       | <0.001                    |
| SCWT card I, mean (SD) <sup>†</sup>                                           | 19.1 (5.6)           | 17.0 (2.6)      | 0.035                     |
| CST-A, mean (SD)                                                              | 28.1 (15.8)          | 21.2 (5.6)      | 0.003                     |
| LDST 60 sec written, mean (SD)                                                | 25.2 (7.2)           | 31.7 (5.7)      | <0.001                    |
| LDST 60 sec oral, mean (SD)                                                   | 31.1 (7.5)           | 37.1 (6.5)      | <0.001                    |
| <b>Planning (compound z-score), mean (SD)</b>                                 | -0.3 (0.8)           | 0.3 (0.6)       | <0.001                    |
| BADS key search, mean (SD)                                                    | 2.2 (1.5)            | 3.1 (1.2)       | 0.004                     |
| BADS zoo map, mean (SD) <sup>†</sup>                                          | 2.2 (0.8)            | 2.7 (0.7)       | <0.001                    |
| <b>Working memory (compound z-score), mean (SD)</b>                           | -0.6 (0.8)           | -0.2 (0.8)      | 0.087                     |
| VVLT trial 1, mean (SD)                                                       | 4.4 (1.9)            | 5.5 (2.1)       | 0.003                     |
| DS backward, mean (SD)                                                        | 3.0 (1.1)            | 3.1 (1.2)       | 0.485                     |
| <b>Verbal memory (compound z-score), mean (SD)</b>                            | -0.5 (1.1)           | 0.0 (1.0)       | 0.004                     |
| VVLT total recall 1–5, mean (SD)                                              | 40.2 (10.8)          | 47.3 (10.2)     | <0.001                    |
| VVLT delayed recall, mean (SD)                                                | 7.3 (3.5)            | 9.1 (3.2)       | 0.011                     |
| VVLT retention max, mean (SD) <sup>†</sup>                                    | 0.6 (0.3)            | 0.7 (0.2)       | 0.060                     |
| <b>Cognitive flexibility (compound z-score), mean (SD)</b>                    | -1.2 (1.6)           | -0.0 (0.8)      | <0.001                    |
| SCWT card III, mean (SD) <sup>†</sup>                                         | 60.9 (26.7)          | 43.0 (13.0)     | <0.001                    |
| CST-C, mean (SD)                                                              | 51.1 (26.3)          | 35.3 (11.6)     | <0.001                    |
| <b>General cognitive impairment (2 out of 6 subtest Z scores -1SD), n (%)</b> | 51 (56.7)            | 12 (13.3)       | 0.128                     |
| <b>Cognitive complaints</b>                                                   |                      |                 |                           |
| CFQ absent-mindedness, mean (SD)                                              | 8.2 (5.4)            | 7.1 (3.6)       | 0.615                     |
| CFQ social interactions, mean (SD)                                            | 5.7 (3.3)            | 4.9 (2.2)       | 0.685                     |
| CFQ names and words, mean (SD)                                                | 5.7 (2.6)            | 4.9 (2.0)       | 0.028                     |
| CFQ orientation, mean (SD)                                                    | 2.7 (2.6)            | 2.3 (1.7)       | 0.638                     |
| CFQ total score, mean (SD)                                                    | 31.8 (17.3)          | 27.3 (11.0)     | 0.843                     |

Abbreviations: BADS, Behavioural Assessment of the Dysexecutive Syndrome; CFQ, Cognitive Failure Questionnaire; CST, Concept Shifting Test; DS, Digit Span; LDST, Letter Digit Substitution Test; MMSE, Mini-Mental State Examination; SCWT, Stroop Color-Word Test; SD, standard deviation; VVLT, Visual Verbal Learning Test. \*, Adjusted for matching variables age, educational level, and smoking status, and comorbidities (myocardial infarction, peripheral vascular disease, hemiplegia, clinically relevant symptoms of depression, and clinically relevant symptoms of anxiety). †, Nonparametric statistical tests have been used because of skewed data.

**Table S5. Raw unadjusted means on neuropsychological measures and compound z-scores in patients with COPD with and without oxygen therapy**

| Outcome measure                                                               | COPD patients with oxygen therapy (n=18) | COPD patients without oxygen therapy (n=72) | P-value |
|-------------------------------------------------------------------------------|------------------------------------------|---------------------------------------------|---------|
| <b>Global cognitive functioning</b>                                           |                                          |                                             |         |
| MMSE, mean (SD)*                                                              | 27.3 (2.9)                               | 27.4 (2.1)                                  | 0.620   |
| Global cognitive impairment (MMSE ≤24), n (%)                                 | 2 (11.1)                                 | 5 (6.9)                                     | 0.426   |
| <b>Domain-specific cognition</b>                                              |                                          |                                             |         |
| <b>Psychomotor speed (compound z-score), mean (SD)*</b>                       |                                          |                                             |         |
| SCWT card I, mean (SD)*                                                       | -0.6 (1.4)                               | -0.4 (0.9)                                  | 0.912   |
| SCWT card I, mean (SD)*                                                       | 19.4 (8.6)                               | 19.1 (4.6)                                  | 0.443   |
| CST-A, mean (SD)*                                                             | 31.9 (29.1)                              | 27.2 (10.2)                                 | 0.972   |
| LDST 60 sec written, mean (SD)                                                | 24.1 (8.1)                               | 25.5 (6.9)                                  | 0.479   |
| LDST 60 sec oral, mean (SD)                                                   | 31.3 (8.9)                               | 31.1 (7.2)                                  | 0.911   |
| <b>Planning (compound z-score), mean (SD)</b>                                 | -0.0 (0.8)                               | -0.3 (0.7)                                  | 0.200   |
| BADS key search, mean (SD)*                                                   | 2.8 (1.5)                                | 2.1 (1.5)                                   | 0.071   |
| BADS zoo map, mean (SD)                                                       | 2.2 (0.8)                                | 2.2 (0.8)                                   | 0.753   |
| <b>Working memory (compound z-score), mean (SD)</b>                           | -0.4 (0.9)                               | -0.6 (0.7)                                  | 0.350   |
| VVLT trial 1, mean (SD)*                                                      | 4.9 (2.1)                                | 4.2 (1.8)                                   | 0.158   |
| DS backward, mean (SD)*                                                       | 2.9 (1.1)                                | 3.0 (1.1)                                   | 0.941   |
| <b>Verbal memory (compound z-score), mean (SD)</b>                            | -0.3 (1.1)                               | -0.5 (1.1)                                  | 0.418   |
| VVLT total recall 1–5, mean (SD)                                              | 41.7 (12.5)                              | 39.9 (10.4)                                 | 0.535   |
| VVLT delayed recall, mean (SD)                                                | 7.8 (3.9)                                | 7.2 (3.4)                                   | 0.529   |
| VVLT retention max, mean (SD)*                                                | 0.7 (0.3)                                | 0.6 (0.3)                                   | 0.904   |
| <b>Cognitive flexibility (compound z-score), mean (SD)*</b>                   | -1.3 (1.8)                               | -1.1 (1.5)                                  | 0.793   |
| SCWT card III, mean (SD)*                                                     | 61.1 (33.4)                              | 60.8 (25.0)                                 | 0.493   |
| CST-C, mean (SD)*                                                             | 59.1 (39.6)                              | 49.0 (21.8)                                 | 0.259   |
| <b>General cognitive impairment (2 out of 6 subtest Z scores -1SD), n (%)</b> | 9 (50.0)                                 | 42 (58.3)                                   | 0.353   |
| <b>Cognitive complaints</b>                                                   |                                          |                                             |         |
| CFQ absent-mindedness, mean (SD)*                                             | 9.2 (5.9)                                | 8.0 (5.3)                                   | 0.268   |
| CFQ social interactions, mean (SD)                                            | 5.9 (3.7)                                | 5.7 (3.2)                                   | 0.823   |
| CFQ names and words, mean (SD)                                                | 5.8 (3.1)                                | 5.6 (2.5)                                   | 0.840   |
| CFQ orientation, mean (SD)*                                                   | 2.7 (3.4)                                | 2.6 (2.4)                                   | 0.656   |
| CFQ total score, mean (SD)*                                                   | 34.0 (21.0)                              | 31.2 (16.4)                                 | 0.668   |

Abbreviations: BADS, Behavioural Assessment of the Dysexecutive Syndrome; CFQ, Cognitive Failure Questionnaire; CST, Concept Shifting Test; DS, Digit Span; LDST, Letter Digit Substitution Test; MMSE, Mini-Mental State Examination; SCWT, Stroop Color-Word Test; SD, standard deviation; VVLT, Visual Verbal Learning Test.. \*, Nonparametric statistical tests have been used because of skewed data.

**Table S6. Raw unadjusted means on neuropsychological measures and compound z-scores in patients with COPD with and without clinically relevant symptoms of depression**

| Outcome measure                                                                   | COPD patients with symptoms of depression (n=19) | COPD patients without symptoms of depression (n=71) | P-value |
|-----------------------------------------------------------------------------------|--------------------------------------------------|-----------------------------------------------------|---------|
| <b>Global cognitive functioning</b>                                               |                                                  |                                                     |         |
| MMSE, mean (SD)*                                                                  | 27.9 (1.7)                                       | 27.2 (2.4)                                          | 0.321   |
| Global cognitive impairment (MMSE ≤24), n (%)                                     | 1 (5.3)                                          | 6 (8.5)                                             | 0.542   |
| <b>Domain-specific cognition</b>                                                  |                                                  |                                                     |         |
| <b>Psychomotor speed (compound z-score), mean (SD)*</b>                           | -0.4 (0.9)                                       | -0.5 (1.1)                                          | 0.925   |
| SCWT card I, mean (SD)*                                                           | 18.9 (4.6)                                       | 19.2 (5.8)                                          | 0.953   |
| CST-A, mean (SD)*                                                                 | 25.9 (6.7)                                       | 28.7 (17.4)                                         | 0.707   |
| LDST 60 sec written, mean (SD)                                                    | 25.2 (7.8)                                       | 25.2 (7.0)                                          | 0.983   |
| LDST 60 sec oral, mean (SD)                                                       | 30.8 (6.4)                                       | 31.2 (7.8)                                          | 0.867   |
| <b>Planning (compound z-score), mean (SD)</b>                                     | -0.3 (0.7)                                       | -0.2 (0.8)                                          | 0.559   |
| BADS key search, mean (SD)*                                                       | 2.0 (1.6)                                        | 2.3 (1.5)                                           | 0.507   |
| BADS zoo map, mean (SD)                                                           | 2.2 (0.6)                                        | 2.2 (0.9)                                           | 0.945   |
| <b>Working memory (compound z-score), mean (SD)</b>                               | -0.6 (0.5)                                       | -0.6 (0.8)                                          | 0.919   |
| VVLT trial 1, mean (SD)*                                                          | 4.8 (2.3)                                        | 4.3 (1.8)                                           | 0.440   |
| DS backward, mean (SD)*                                                           | 2.7 (1.0)                                        | 3.1 (1.1)                                           | 0.277   |
| <b>Verbal memory (compound z-score), mean (SD)</b>                                | -0.3 (0.9)                                       | -0.5 (1.1)                                          | 0.465   |
| VVLT total recall 1–5, mean (SD)                                                  | 43.0 (8.7)                                       | 39.5 (11.2)                                         | 0.213   |
| VVLT delayed recall, mean (SD)                                                    | 8.0 (2.4)                                        | 7.1 (3.7)                                           | 0.335   |
| VVLT retention max, mean (SD)*                                                    | 0.7 (0.2)                                        | 0.6 (0.3)                                           | 0.498   |
| <b>Cognitive flexibility (compound z-score), mean (SD)*</b>                       | -1.3 (1.3)                                       | -1.2 (1.6)                                          | 0.409   |
| SCWT card III, mean (SD)*                                                         | 62.3 (17.7)                                      | 60.5 (28.7)                                         | 0.134   |
| CST-C, mean (SD)*                                                                 | 50.0 (20.1)                                      | 51.3 (27.9)                                         | 0.839   |
| <b>General cognitive impairment (2 out of 6 subtest Z scores &lt;-1SD), n (%)</b> | 13 (68.4)                                        | 38 (53.5)                                           | 0.184   |
| <b>Cognitive complaints</b>                                                       |                                                  |                                                     |         |
| CFQ absent-mindedness, mean (SD)*                                                 | 11.1 (6.7)                                       | 7.4 (4.8)                                           | 0.013   |
| CFQ social interactions, mean (SD)                                                | 6.8 (3.8)                                        | 5.4 (3.1)                                           | 0.097   |
| CFQ names and words, mean (SD)                                                    | 5.6 (2.9)                                        | 5.7 (2.5)                                           | 0.947   |
| CFQ orientation, mean (SD)*                                                       | 3.5 (3.4)                                        | 2.4 (2.4)                                           | 0.109   |
| CFQ total score, mean (SD)*                                                       | 39.4 (22.3)                                      | 29.7 (15.3)                                         | 0.054   |

Abbreviations: see table S4. \*, Nonparametric statistical tests have been used because of skewed data.



**Table S7. Raw unadjusted means on neuropsychological measures and compound z-scores in patients with COPD with and without clinically relevant symptoms of anxiety**

| <b>Outcome measure</b>                                                            | <b>COPD patients with symptoms of anxiety (n=28)</b> | <b>COPD patients without symptoms of anxiety (n=62)</b> | <b>P-value</b> |
|-----------------------------------------------------------------------------------|------------------------------------------------------|---------------------------------------------------------|----------------|
| <b>Global cognitive functioning</b>                                               |                                                      |                                                         |                |
| MMSE, mean (SD)*                                                                  | 27.3 (2.5)                                           | 27.4 (2.2)                                              | 0.891          |
| Global cognitive impairment (MMSE ≤24), n (%)                                     | 3 (10.7)                                             | 4 (6.5)                                                 | 0.376          |
| <b>Domain-specific cognition</b>                                                  |                                                      |                                                         |                |
| <b>Psychomotor speed (compound z-score), mean (SD)*</b>                           | -0.4 (1.0)                                           | -0.5 (1.1)                                              | 0.889          |
| SCWT card I, mean (SD)*                                                           | 19.0 (5.1)                                           | 19.2 (5.8)                                              | 0.747          |
| CST-A, mean (SD)*                                                                 | 25.8 (7.7)                                           | 29.2 (18.3)                                             | 0.403          |
| LDST 60 sec written, mean (SD)                                                    | 25.6 (8.2)                                           | 25.0 (6.7)                                              | 0.689          |
| LDST 60 sec oral, mean (SD)                                                       | 30.9 (7.5)                                           | 31.2 (7.6)                                              | 0.885          |
| <b>Planning (compound z-score), mean (SD)</b>                                     | -0.3 (0.7)                                           | -0.2 (0.8)                                              | 0.631          |
| BADS key search, mean (SD)*                                                       | 2.0 (1.5)                                            | 2.3 (1.5)                                               | 0.416          |
| BADS zoo map, mean (SD)                                                           | 2.3 (0.7)                                            | 2.2 (0.9)                                               | 0.629          |
| <b>Working memory (compound z-score), mean (SD)</b>                               | -0.6 (0.7)                                           | -0.5 (0.8)                                              | 0.618          |
| VVLT trial 1, mean (SD)*                                                          | 4.8 (2.1)                                            | 4.2 (1.7)                                               | 0.232          |
| DS backward, mean (SD)*                                                           | 2.6 (1.0)                                            | 3.1 (1.1)                                               | 0.036          |
| <b>Verbal memory (compound z-score), mean (SD)</b>                                | -0.4 (1.0)                                           | -0.5 (1.1)                                              | 0.448          |
| VVLT total recall 1–5, mean (SD)                                                  | 43.2 (10.6)                                          | 38.9 (10.7)                                             | 0.083          |
| VVLT delayed recall, mean (SD)                                                    | 8.0 (3.2)                                            | 7.0 (3.6)                                               | 0.325          |
| VVLT retention max, mean (SD)*                                                    | 0.7 (0.2)                                            | 0.6 (0.3)                                               | 0.427          |
| <b>Cognitive flexibility (compound z-score), mean (SD)*</b>                       | -1.2 (1.5)                                           | -1.2 (1.6)                                              | 0.428          |
| SCWT card III, mean (SD)*                                                         | 61.8 (24.8)                                          | 60.5 (27.7)                                             | 0.491          |
| CST-C, mean (SD)*                                                                 | 49.5 (17.7)                                          | 51.7 (29.5)                                             | 0.679          |
| <b>General cognitive impairment (2 out of 6 subtest Z scores &lt;-1SD), n (%)</b> | 18 (64.3)                                            | 33 (53.2)                                               | 0.227          |
| <b>Cognitive complaints</b>                                                       |                                                      |                                                         |                |
| CFQ absent-mindedness, mean (SD)*                                                 | 9.6 (6.1)                                            | 7.6 (5.0)                                               | 0.113          |
| CFQ social interactions, mean (SD)                                                | 6.4 (3.4)                                            | 5.4 (3.2)                                               | 0.202          |
| CFQ names and words, mean (SD)                                                    | 5.4 (2.9)                                            | 5.8 (2.5)                                               | 0.503          |
| CFQ orientation, mean (SD)*                                                       | 3.2 (3.0)                                            | 2.4 (2.4)                                               | 0.223          |
| CFQ total score, mean (SD)*                                                       | 35.4 (19.9)                                          | 30.1 (15.9)                                             | 0.255          |

Abbreviations: see table S4. \*, Nonparametric statistical tests have been used because of skewed data.

## References

1. Luteijn F, Barelds, D.P.F. GIT-2: Groninger Intelligentie Test 2. Handleiding. Amsterdam: Pearson Assessment and Information B.V.
2. Cockrell JR, Folstein MF. Mini-Mental State Examination (MMSE). *Psychopharmacol Bull.* 1988;24(4):689-92.
3. Van der Elst W, Van Boxtel MP, Van Breukelen GJ, Jolles J. The Stroop color-word test: influence of age, sex, and education; and normative data for a large sample across the adult age range. *Assessment.* 2006;13(1):62-79.
4. Van der Elst W, Van Boxtel MP, Van Breukelen GJ, Jolles J. The Concept Shifting Test: adult normative data. *Psychol Assess.* 2006;18(4):424-32.
5. van der Elst W, van Boxtel MP, van Breukelen GJ, Jolles J. The Letter Digit Substitution Test: normative data for 1,858 healthy participants aged 24-81 from the Maastricht Aging Study (MAAS): influence of age, education, and sex. *J Clin Exp Neuropsychol.* 2006;28(6):998-1009.
6. Van der Elst W, van Boxtel MP, van Breukelen GJ, Jolles J. Rey's verbal learning test: normative data for 1855 healthy participants aged 24-81 years and the influence of age, sex, education, and mode of presentation. *Journal of the International Neuropsychological Society : JINS.* 2005;11(3):290-302.
7. Wechsler D. Wechsler Adult Intelligence Scale—Revised. San Antonio, TX: The Psychological Corporation; 1981.
8. Wilson BA, Aldermann, N., Burgess, B.W., et al. . Behavioural assessment of the dysexecutive syndrome. Bury St Edmunds: Thames Valley Test Co; 1998.
9. Merckelbach H, Muris P, Nijman H, de Jong PJ. Self-reported cognitive failures and neurotic symptomatology. *Pers Individ Differ.* 1996;20(6):715-24.
